# Supplementary material for: Fabrication of well-aligned Co-MOF arrays through a controlled and moderate process for the development of a flexible tetrabromobisphenol A sensor
Source: Royal Society of Chemistry journal article supplement (doi:10.1039/d3an01950k), 2024-01-01
Supplement: d3an01950k1.pdf [file d3an01950k1.pdf]

Supplementary Materials for  
**Fabrication of well-aligned Co-MOF arrays through a controlled and moderate process for the development of a flexible TBBPA sensor**

Shiyuan Wang <sup>a#</sup>, Yao Chen <sup>a#</sup>, Mei Long <sup>b</sup>, Wanyu Li <sup>a</sup>, Yiran Huang <sup>a</sup>, Shiyi Lai <sup>a</sup>, Guiping Yang <sup>a</sup>,  
Yang Song <sup>a</sup>, Jinfa Chen <sup>c\*</sup>, Guangxia Yu <sup>a\*</sup>

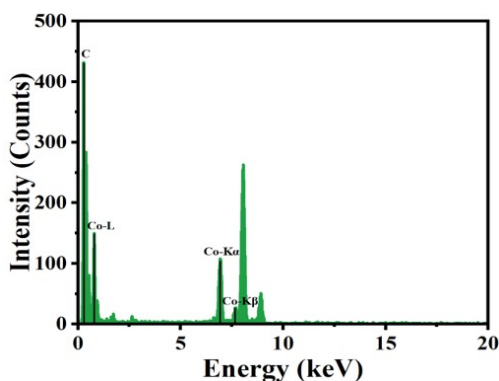

Fig. S1. EDX spectrum of Co-MOFs / CC.

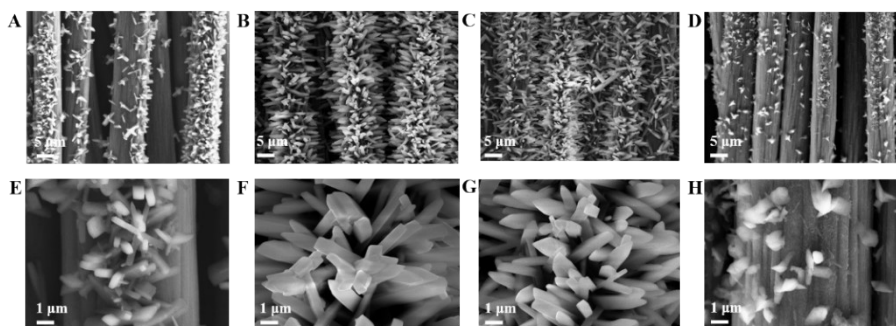

Fig. S2. SEM images of Co-MOFs in different synthesis temperature (A-D: 20, 40, 60, 80 °C; E-H: high magnification lens, respectively).

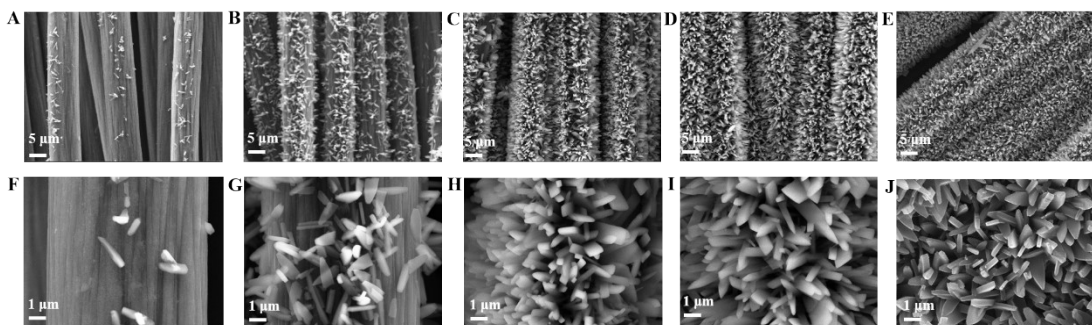

Fig. S3. SEM images of Co-MOFs in different synthesis time (A-D: 30, 45, 60, 120, 180 min; F-J: high magnification lens, respectively).

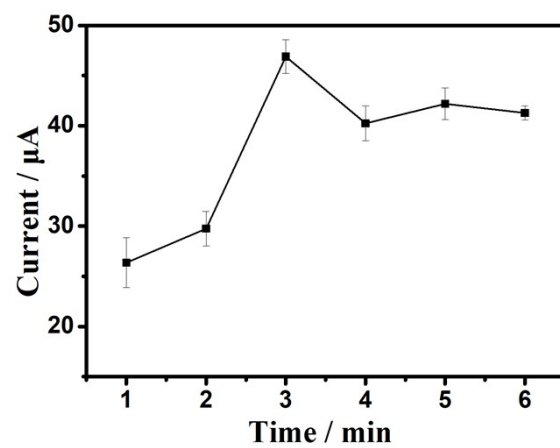

Fig. S4. Differential pulse voltammetry of 5  $\mu\text{M}$  TBBPA on Co-MOFs / CC in 0.1 M PBS at different enrichment time (1, 2, 3, 4, 5, 6 min).
